# Supplementary material
Source: publisher figshare collection journal article supplement (https://tandf.figshare.com/ndownloader/files/17959160)
Supplement: Supplementary file 1 [file 17959160]

**Supplementary Material**

AsgharZamani *a, Ahmad PoursattarMarjani *b, Abbas Nikoob, Mojtaba Heidarpoura and Ahmad Dehghana

* Corresponding author. Tel.: +98-912-630-1594; fax: +98-4432752746; e-mail: A. Zamani- [a.zamani@urmia.ac.ir](mailto:a.zamani@urmia.ac.ir), A. Poursattar Marjani- a.poursattar@urmia.ac.ir

a Department of Nanotechnology, Faculty of Science, Urmia University, Urmia 57154, Urmia, Iran

*b Department of Chemistry, Faculty of Science, Urmia University, Urmia 57154, Urmia, Iran*


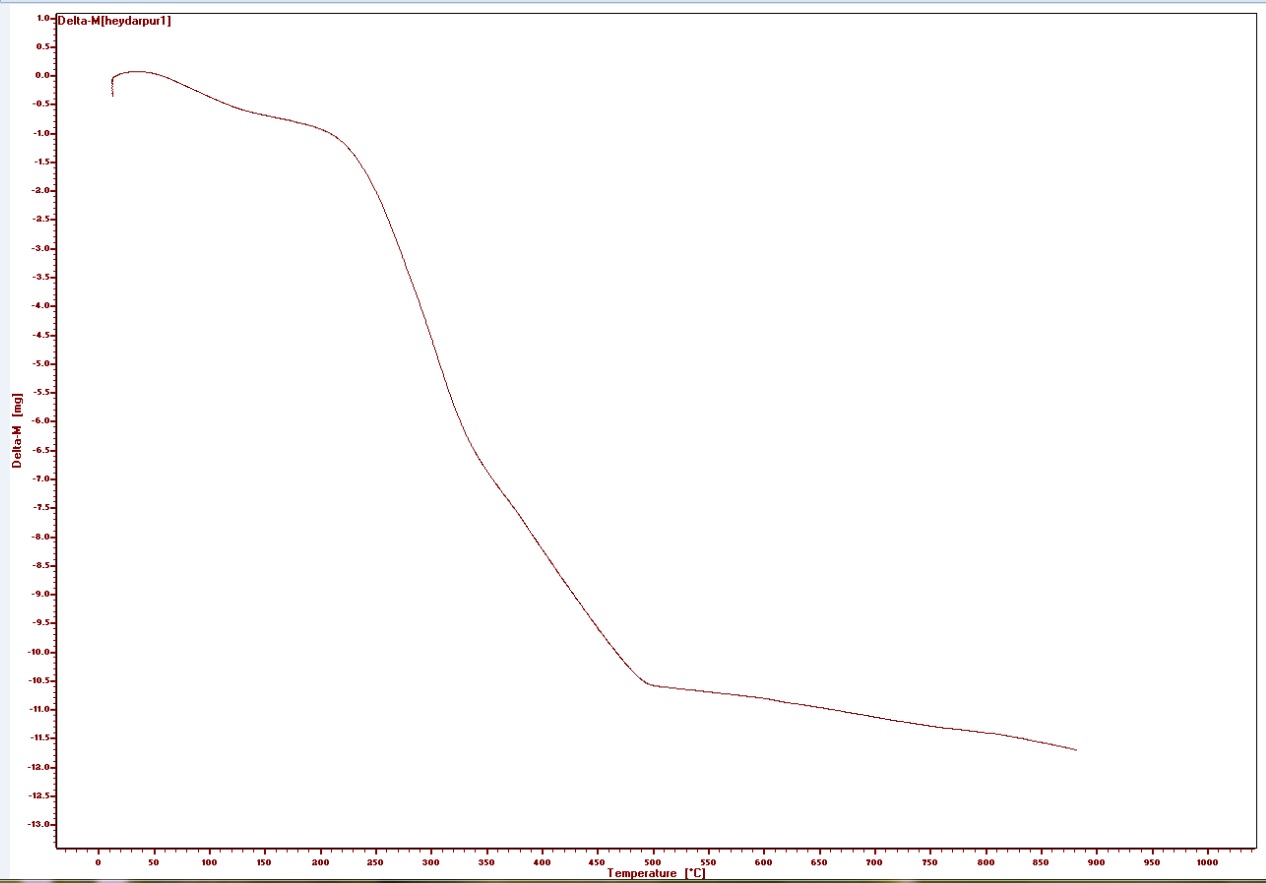


TGA profile of CuNP/WS-1


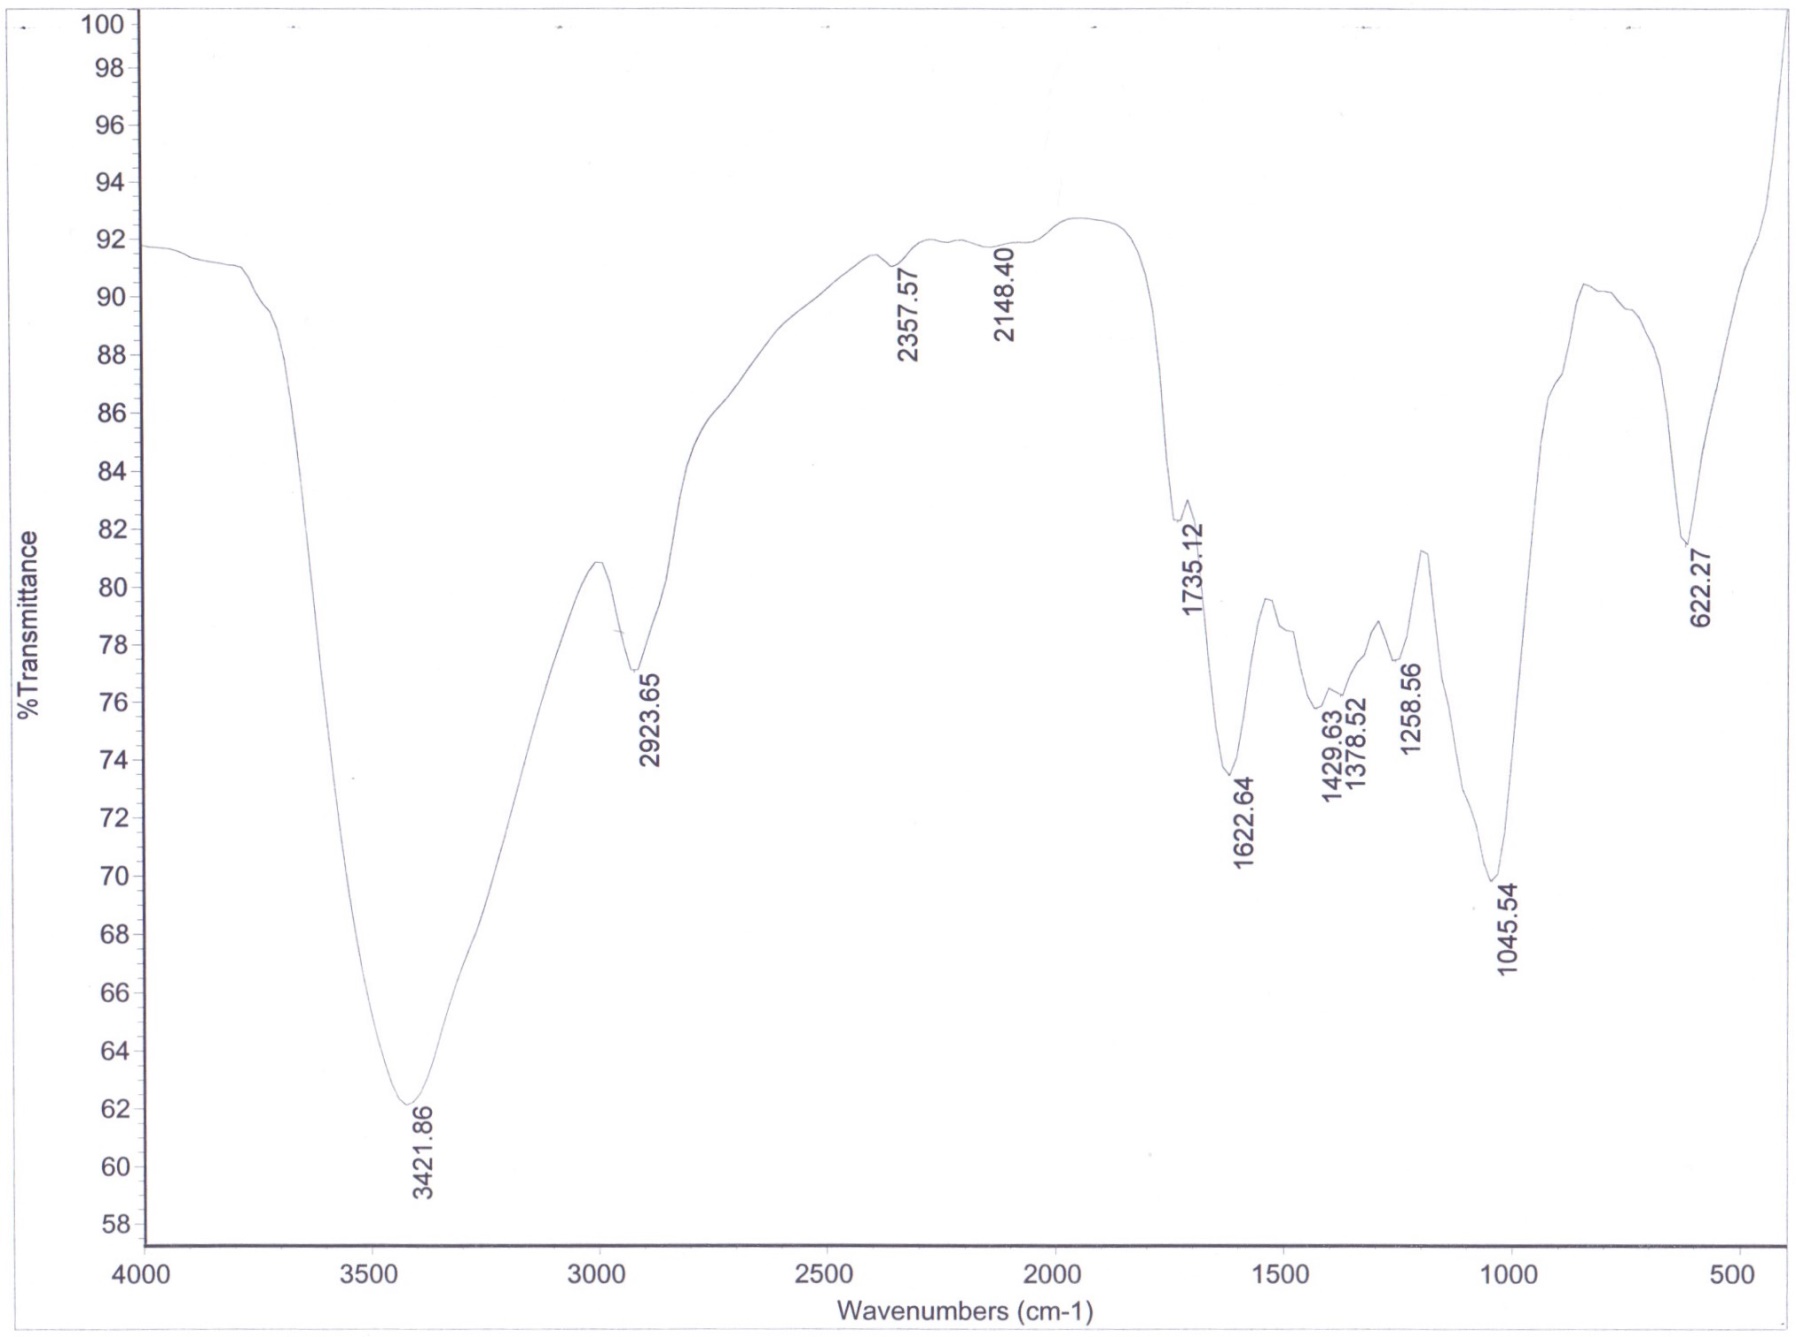


FT-IR spectrum of CuNP/WS-3


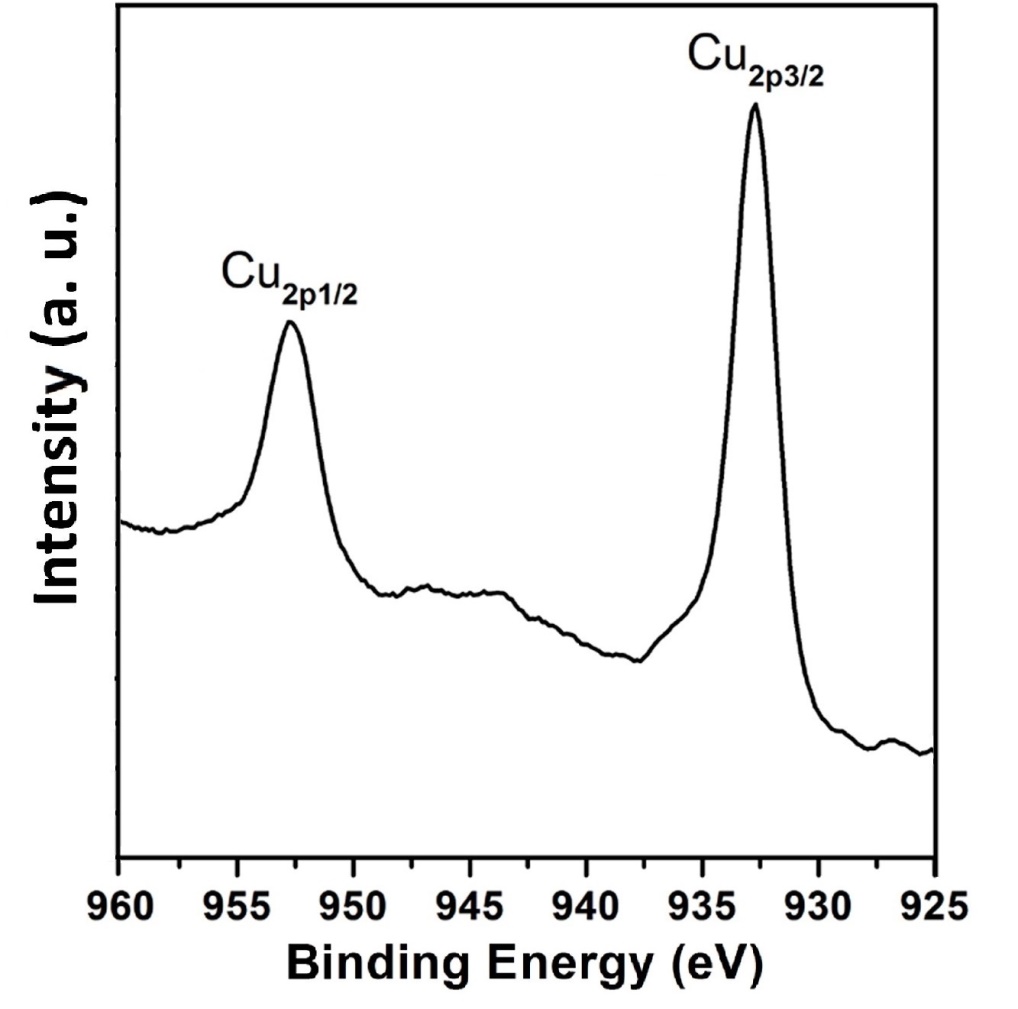


XPS spectrum of CuNP/WS-3
